# Supplementary material
Source: HighWire-hosted journal article supplement (https://www.jneurosci.org/highwire/filestream/600261/field_highwire_adjunct_files/4/Supplemental_Material.pdf)
Supplement: Supplemental_Material.pdf [file Supplemental_Material.pdf]

## **Supplemental Figure Legends**

**Supplemental Figure 1.** Lack of apoE staining in brain sections from mice deficient for apoE (**A**; apoE<sup>-/-</sup>) compared to mice expressing human apoE2 (**B**; TRE2). The specificity of immunolabeling was confirmed by lack of signal in TRE2 brain sections when primary (anti-apoE antibody) was omitted (**C**; 2<sup>0</sup> only).

**Supplemental Figure 2.** Levels of amyloid precursor protein in hippocampal (**A**), cortical (**B**), or cerebellar (**C**) homogenates from PDAPP /TRE mice expressing various human apoE alleles (E2, E3, or E4). \*p<0.01 versus PDAPP/TRE4 ANOVA Tukey-Kramer post test

**Supplemental Figure 3.** Relative level of apolipoprotein E (**A**) or amyloid precursor protein mRNA (**B**) in PDAPP mice expressing various human apolipoprotein E alleles (PDAPP/TRE2, PDAPP/TRE3, or PDAPP/TRE4). Relative level of apolipoprotein E mRNA in the hippocampus (**C**) or cortex (**D**) in TRE (TRE2, TRE3, or TRE4) mice expressing various human apolipoprotein E alleles.

**Supplemental Figure 4.** No significant correlation between soluble levels of apolipoprotein E and A $\beta$  42 extracted from the hippocampus of PDAPP/TRE3 (**A**) or PDAPP/TRE4 (**B**).

## **Supplemental Methods:**

### **Primers for Quantitative PCR**

#### **APP**

forward primer: 5'TGGAGGCTAAGGACTTGTTTCG-3'

reverse primer: 5'-ATGTGACCAGCAACGCAGC-3',

probe: 6FAM-CCTGTGATTGGCCAGTCCAGCTCCT-TAMRA).

#### **APOE**

forward primer: 5'-AGAGAACCAGCATTGCC-3'

reverse primer: 5''-TCATCCCCAGGTGTCTCGAG-3' ,

probe 5'-6FAM-CTGCTGTTGTAGGAACTCGAACCACCTCCT-TAMRA3'
